# Supplementary material for: Effects of Training and Calibration Data on Surface Electromyogram-Based Recognition for Upper Limb Amputees
Source: MDPI journal article supplement (doi:10.3390/s24030920), 2024-01-31
Supplement: s1 [file s1]

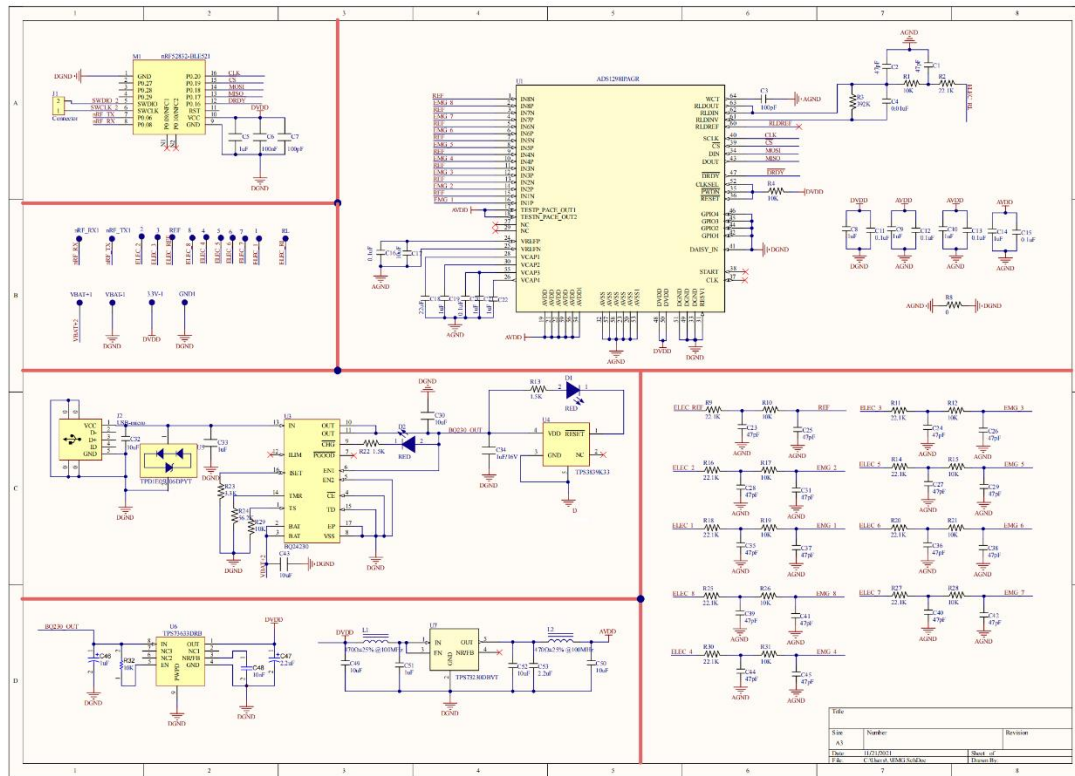

**Figure S1.** Schematic diagram of the EMG signal acquisition circuit.

**Table S1.** Collected Time of Each Session for Each Subject.

| Session   | Time       |            |
|-----------|------------|------------|
|           | Subject S1 | Subject S2 |
| Session 1 | Day 1      | Day 1      |
| Session 2 | Day 1      | Day 1      |
| Session 3 | Day 1      | Day 3      |
| Session 4 | Day 3      | Day 3      |
| Session 5 | Day 13     | Day 3      |
| Session 6 | Day 13     | Day 3      |
| Session 7 | Day 13     | Day 4      |

**Table S2.** The Number of Activity Frames in Each Session for Each Subject

| Session   | Subject S1 | Subject S2 |
|-----------|------------|------------|
| Session 1 | 2033       | 5318       |
| Session 2 | 2379       | 5029       |
| Session 3 | 2127       | 5047       |
| Session 4 | 2059       | 5056       |
| Session 5 | 1842       | 5484       |
| Session 6 | 1723       | 4910       |
| Session 7 | 1837       | 4552       |
| In total  | 14000      | 35396      |

**TableS 3.** Parameter Setting for Different Classifiers Using Scikit-Learn Library in Python.

| Models  | Function Name          | Parameters                                                                                                                |
|---------|------------------------|---------------------------------------------------------------------------------------------------------------------------|
| KNN     | KNeighborsClassifier() | n_neighbors=10                                                                                                            |
| MLP     | MLPClassifier()        | solver='lbfgs', alpha=1e-5<br>hidden_layer_sizes=(200, 100, 100), random_state=1                                          |
| LGBM    | LGBMClassifier()       | Default<br>max_depth=6, learning_rate=0.05, n_estimators=2000,<br>objective='binary:logitraw',                            |
| XGBoost | XGBClassifier()        | tree_method='gpu_hist', subsample=0.8,<br>colsample_bytree=0.8, min_child_samples=3,<br>eval_metric='auc', reg_lambda=0.5 |
| LDA     | LDA()                  | Default                                                                                                                   |
| SVM     | SVC()                  | decision_function_shape='ovr', C=5, kernel='rbf'                                                                          |
